# Supplementary material for: Consumer Transportation Costs and the Value of E-Commerce: Evidence from the Dutch Apparel Industry
Source: Atypon-hosted journal article supplement (doi:10.1287/mksc.2022.1421), 2022-12-28
Supplement: mksc.2022.1421.sm1.pdf [file mksc.2022.1421.sm1.pdf]

Online Appendix For "Consumer Transportation Costs  
and the Value of E-commerce: Evidence from the Dutch  
Apparel Industry"

Yufeng Huang\* and Bart J. Bronnenberg†

November 10, 2022

---

\*University of Rochester Simon Business School. [yufeng.huang@simon.rochester.edu](mailto:yufeng.huang@simon.rochester.edu)

†Tilburg School of Economics and Management and CEPR. [bart.bronnenberg@tilburguniversity.edu](mailto:bart.bronnenberg@tilburguniversity.edu)

## A Online-diary interface of the JURY panel

The screenshot shows the 'Consumer Jury' online diary interface. The main heading is 'Aankopen invullen'. Below it, there is an instruction: 'Instructie: Wilt u in de volgende velden de gegevens noteren van alle kledingstukken (behorende tot bovenkleding) die u heeft gekocht bestemd voor uzelf of voor anderen?'. The form is divided into several sections with questions and input fields. A dropdown menu is open, showing a list of clothing items: Blazer/Colbert, Jasje, Kostuum/Mantelpak/Broekpak, Jurk, Rok, Tuniek, Gilet, Shirt/T-shirt, Polo, Topje/Hemdje, Top Bottom Set/Tuniekpak/Jumpsuit, Overhemd/Blouse, Sweatshirt/Sweater, Trui/Pullover, Spencer, Vest. On the left, there are blue text annotations in Google Translate: 'What kind of garment did you buy?', 'What was the date of the purchase?', 'Where did you make the purchase?', 'At which store/online store did you make the purchase?', 'What is the brand of the garment?', 'Was this purchase made over the internet?', 'How many units?', 'What was the price per unit?', 'Was the purchase on discount?'. On the right, there is a small image of a person shopping and a box with survey details: 'Datum van vandaag: maandag 2 december 2013', 'Panelnummer: 116', 'Puntensaldo: 5.554', 'Nodia iemand uit!'.

Appendix Figure A.1: Online-diary design of the JURY panel

**Notes:** This screenshot illustrates the online diary design of the JURY panel. The left-most texts are Google translations to the questions. The screenshot is taken in February, 2013.

## B Construction of the price index

We construct prices indices at the chain-month level to measure overall price levels across products. One way to construct this index is to simply compute the average purchase price in a given chain-month. However, we only observe price conditional on purchase, and one might worry about a selection problem on *who* purchases the product, as well as on unobserved characteristics of the product purchased. We proceed to construct a price index that is net of these unobserved demand shifters. In particular, we observe *whether* a purchased product is on a price discount, along with its price. We will leverage this data advantage to project price variations into discount frequency and depth variations. The underlying assumption of our approach is that the same discounts are offered to all consumers shopping for products of the same characteristic, and thus, discounts are exogenous to unobserved demand shocks conditional on individual-chain fixed effects and observed demographics and product characteristics. Meanwhile, this assumption is less likely to hold for the purchase price because the price itself is selected by the individual shopper.

To implement this idea, we first estimate two hedonic regressions, of price and discount in-

cidence on year  $y$ , month-of-the-year  $m$ , observed product characteristics, consumer demographic variables, and consumer-chain fixed effects. For consumer  $i$  who purchases item  $r$  at chain  $j$  in month  $t$ , we specify

$$\log(\text{price}_{ijrt}) = p_{j0} + \tau_{jy(t)}^0 + \tau_{jm(t)}^0 + \left( \tau_{jy(t)}^1 + \tau_{jm(t)}^1 \right) \cdot \text{discount}_{ijrt} + x_{jr}^p \beta_1^p + z_{it}^p \beta_2^p + \alpha_{ij}^p + \omega_{ijrt} \quad (\text{B.1})$$

where the dummies  $\tau_{jy(t)}^0$  and  $\tau_{jm(t)}^0$  capture year and month level variations in the regular price for chain  $j$ , and the dummies  $\tau_{jy(t)}^1$  and  $\tau_{jm(t)}^1$  capture year- and month variations in discount depth. Note that these effects are net of observed product characteristics  $x_{jr}^p$  (brand and product type), observed demographics  $z_{it}^p$ , and consumer-chain fixed effects  $\alpha_{ij}^p$ . Similarly, we also estimate

$$\text{discount}_{ijrt} = d_{j0} + \eta_{jy(t)} + \eta_{jm(t)} + x_{jr}^d \beta_1^d + z_{it}^d \beta_2^d + \alpha_{ij}^d + v_{ijrt} \quad (\text{B.2})$$

to obtain  $\eta_{jy(t)}$  and  $\eta_{jm(t)}$  as year- and month-of-the-year variations in the discount frequency. Estimating both Equation (B.1) and (B.2), we then construct the price index as

$$\log(P_{jt}) = \hat{p}_{j0} + \hat{\tau}_{jy(t)}^1 \times \hat{\eta}_{jy(t)} + \hat{\tau}_{jm(t)}^1 \times \hat{\eta}_{jm(t)} \quad (\text{B.3})$$

where we explicitly concentrate on only the chain-average price level  $\hat{p}_{j0}$  and the over-time variations in discount depth and discount frequency.

## C Do store locations and price discounts target local consumer demographics?

To identify consumers' distance sensitivity, the key assumption is that, within the coverage area of a store, consumers are dispersed and the store cannot locate precisely to target individual consumer characteristics or unobserved demand (beyond targeting the demographics and unobserved demand of an area). Recall that we show in Section 3 that those who are close to a newly-entered store do not exhibit a different time trend to shop at the chain, compared to those who are further away from the store, supporting this identifying assumption. We now complement this exercise and demonstrate that the store's location indeed does not target observed demographics beyond the broad demographics in a region.

We first take a 30% random sample of the balanced individual-level data at the individual-chain-month level (i.e. including no-purchase occasions). We combine this sample with 4-digit zip code level average income and total population (from 2007 to 2014), which we obtain from the census. This exercise brings us to a balanced panel where we can examine whether the presence of the chain in the consumer's local zip code (5-digit zip code) is explained by the consumer's demographics or the demographics of a broader area. Denote  $\bar{\text{inc}}_{jt}$  as a measure of the average income of the chain's customer base, here constructed as expenditure-weighted average income from the purchase panel. We now estimate

$$100 \times \text{store\_in\_zip5}_{ijt} = b_0 \text{hhinc}_{it} + b_1 \text{hhinc}_{it} \times \bar{\text{inc}}_{jt} + b_2 \text{zipinc}_{m(i)t} + b_3 \text{zipinc}_{m(i)t} \times \bar{\text{inc}}_{jt} + \delta_{ij} + \lambda_{jt} + \varepsilon_{ijt} \quad (\text{C.4})$$

where  $\text{store\_in\_zip5}_{ijt}$  indicates 1 if the closest store of  $j$  to a given consumer  $i$  is in the same five-digit zip code as the consumer,  $\text{hhinc}_{it}$  is the household income of  $i$  and  $\text{zipinc}_{m(i)t}$  is the average household income in the 4-digit zip code of  $i$ ,  $m(i)$ . If the chain selectively enters into markets (4-digit zip codes) with local income matching its typical clientele, we should expect  $b_3$  to be positive. In addition, if the chain further targets granular clusters of consumers within the 4-digit zip code, one should expect  $b_1$  to be positive.

We present the estimates in the first column of Table C.1. We find that given the set of controls, store location is correlated with the interaction between 4-digit zip code level income and the income of the chain's clientele, but the correlation is small in magnitude. Suppose Chain A caters to customers with an average of €40,000 annual income and Chain B's customers have an income of €20,000. When the average income of a market grows by €1,000, the positive coefficient  $\hat{b}_3$  suggests that Chain A will be more likely to enter in this market than Chain B – consistent with the conjecture that chains selectively enter into markets that are similar to their own clientele. However, compared to Chain B, Chain A is  $20 \times 1 \times \hat{b}_3 = 20 \times 0.000053 = 0.0011$  percentage points more likely to enter this market, or 0.4% relative to the baseline entry probability at 0.25 percent-

Appendix Table C.1: Targeting of store location and price discounts

|                        | store in zip5           | discount             |
|------------------------|-------------------------|----------------------|
| household income       | 0.001093***<br>(0.000)  | -0.088312<br>(0.093) |
| ... X clientele income | -0.000036***<br>(0.000) | 0.001237<br>(0.003)  |
| average zip4 income    | -0.007005***<br>(0.001) | -0.271892<br>(0.193) |
| ... X clientele income | 0.000053***<br>(0.000)  | 0.009949*<br>(0.006) |
| zip4 population        | 0.013308***<br>(0.002)  | 0.132689<br>(0.139)  |
| individual-chain FE    | Yes                     | Yes                  |
| chain-year FE          | Yes                     | Yes                  |
| month FE               | Yes                     | Yes                  |
| R-squared              | 0.96                    | 0.37                 |
| observations           | 15923662                | 566730               |

**Notes:** Column 1 reports regression results of Equation (C.4). Column 2 focuses on the sample of consumer purchases and reports whether discounts are targeted to local income, using the same set of controls as Equation (C.4). The dependent variables are percentage points and the income variables are in thousand euros.

age points. This estimate suggests that store locations do target to the average local income but the degree of targeting is negligible.

More importantly, we find that store locations do not target individual income within the local 4-digit zip code market. For a given consumer, her income increasing by €1,000 will predict that she is 0.3% *less* likely to be close to Chain A, the high-end chain. Where the sign might be counter-intuitive, we note that the magnitude of this effect is economically negligible. We conclude that we do not find evidence that store locations target to changes in customer income within a 4-digit zip code.

We further examine whether discounts are targeted to local markets in a similar way. We take the sample of consumer purchases and estimate whether a purchase contains a product on discount, on the same set of variables and fixed effects as Equation (C.4). We find that an increase in the average income of the 4-digit zip code is associated with fewer discounts: A €1,000 increase in the average income predicts 0.27 *percentage point* decrease in the share of discount (and it is statistically insignificant), or 0.5% relative to the 47 percentage point baseline discount level. Similarly, the interaction with chain's clientele characteristics also return a small effect. Further, given the average income at the 4-digit zip code level, individual consumer income and its interaction with the chain's clientele do not predict the share of discount this consumer purchases in a statistically or economically significant way. We find no sign of targeted price discounts.

## D Additional descriptive statistics

**Diversity of retail formats.** Table D.1 shows summary statistics at the consumer-chain-month level, using the full (unbalanced) sample and taking into account consumer-months without purchase. We examine, for the overall sample and then by retail format, the frequency of shopping incidence, expenditure given the incidence, frequency of shopping online, and shopping distance if the consumer shops offline. Consumers travel further for branded chains (e.g. H&M) and for specialty stores (e.g. The Shoe Factory). The share of online sales are higher for branded chains and department stores.

Appendix Table D.1: Summary of expenditure, variety, channel, and shopping distance

|                                    | branded   | department | discounter | general   | online    | specialty | all formats |
|------------------------------------|-----------|------------|------------|-----------|-----------|-----------|-------------|
| purchase offline                   | 0.141     | 0.035      | 0.092      | 0.091     | 0.000     | 0.057     | 0.292       |
| purchase online                    | 0.016     | 0.003      | 0.002      | 0.003     | 0.032     | 0.005     | 0.055       |
| number of chains purchased from    | 4.603     | 0.205      | 1.125      | 0.511     | 1.228     | 2.148     | 9.922       |
| expenditure if purchase            | 62.725    | 59.674     | 22.307     | 17.207    | 67.233    | 60.609    | 21.562      |
| distance of offline purchase       | 10.521    | 9.329      | 3.226      | 4.564     | 0.000     | 26.081    | 1.573       |
| observations (HH-chain-year-month) | 1,111,402 | 1,111,402  | 1,111,402  | 1,111,402 | 1,111,402 | 1,111,402 | 1,111,402   |

**Notes:** This table reports offline and online incidence at the monthly level, expenditure given shopping incidence, number of distinct chains shopped at, and shopping distance if the consumer shops offline.

**Growth of e-commerce across retail formats.** Figure D.1 presents the growth of total and online expenditure across retail formats. One finds that while all formats growth in the total online expenditure (except for department stores, which saw exit of a major player in 2016), the within-format growth rate of online expenditure is lower than the total growth rate. This contrast is explained by the composition change across formats – in particular, online chains take an increasingly significant role.

**Choice of variety.** We examine the number of chains a consumer purchases from, and the composition of expenditure among these chains, in each trip and within various time windows. Table D.2 shows the average number of chains a consumer purchases from and the share of expenditure at the top chain, on the unit of analysis of consumer-date, consumer-month, and consumer-quarter. We find that there are limited multi-chain visits within a shopping date: 87.5% trips are only associated with purchasing from one chain and the top chain takes 96% expenditure on that day.

Over a wider time frame, however, we do observe that the consumer purchases from more than one chain: 42% of months and 59% of quarters with positive expenditure are associated with at least two chains. Aggregating across time, only 13% consumers ever bought from only one chain. This indicates significant choice of variety chosen by the consumer, but importantly not on the same date.

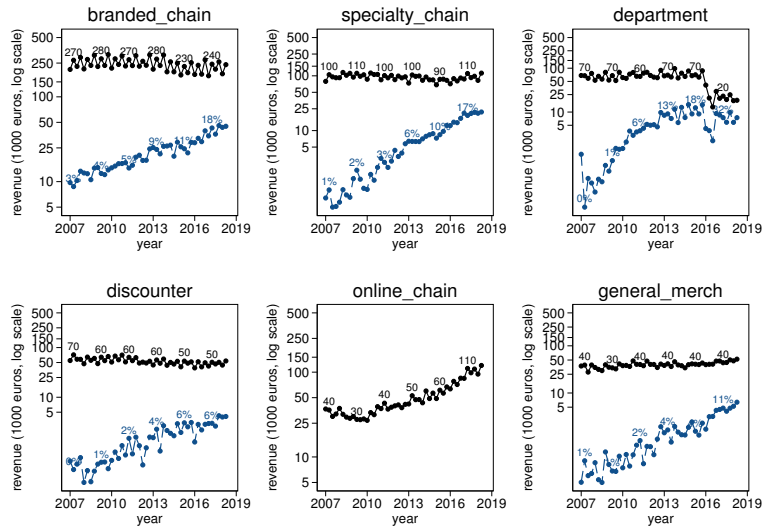

Appendix Figure D.1: Growth of e-commerce by format

**Note:** See note of Figure 3.

Appendix Table D.2: Choice of variety in various time window definitions

|                                     | same day | same month | same quarter | entire sample |
|-------------------------------------|----------|------------|--------------|---------------|
| purchase from 1 chain               | 0.868    | 0.575      | 0.575        | 0.139         |
| purchase from 2 chains              | 0.106    | 0.231      | 0.231        | 0.092         |
| purchase from 3 chains              | 0.020    | 0.102      | 0.102        | 0.066         |
| purchase from 4+ chains             | 0.006    | 0.093      | 0.093        | 0.703         |
| expd. share, chain of highest expd. | 0.954    | 0.827      | 0.827        | 0.387         |
| observations                        | 551,214  | 355,718    | 355,718      | 23,976        |

**Notes:** Number of distinct chains the HH purchases from, conditional on making a purchase in a given time window.

## E Additional results of the effect of distance

**Flexible functional form.** We present a flexible specification on the effect of distance. We estimate Equation (3) with the same set of control variables, but with a series of distance bins to capture the effect of distance in a flexible way. We find that the shape of the effect is concave, with the marginal effect of distance decreasing the further a consumer is away from the store. In addition, we find that the  $\log(D_{ijt} + 1)$  specification is almost exactly correct when the consumer is within 15km of the store, which is a range with the majority of offline purchases (See Figure 4). Beyond this range, the marginal effect of distance further declines.

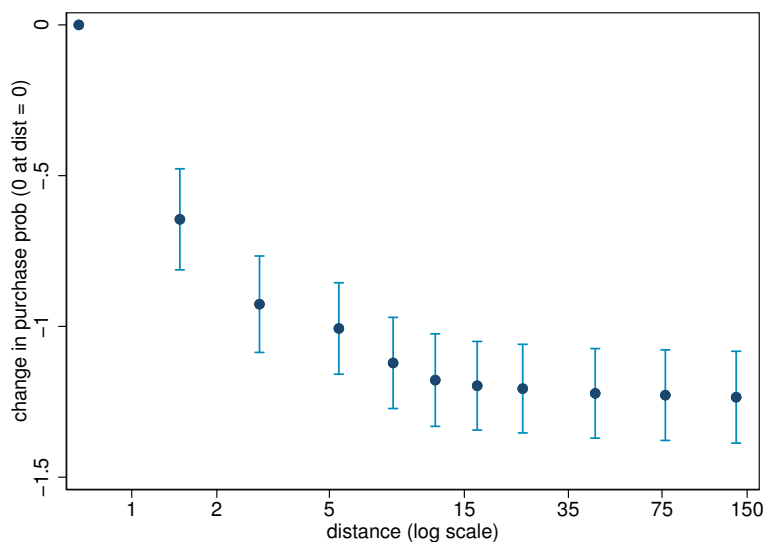

Appendix Figure E.1: Heterogeneous marginal effect of  $\log(D_{ijt} + 1)$

**Note:** This figure visualizes the estimates of a more flexible distance-sensitivity regression. The x-axis presents distance bins that are rescaled to the  $\log(D + 1)$  specification, and the y-axis is the marginal effect of distance for each bin.

**The effect of distance by-format.** We present estimation results of Equation (3) separately by retail format. While we find significant heterogeneity in the sensitivity to distance across retail formats, we consistently find no evidence that offline and online channels are net substitutes or complements.

Appendix Table E.1: Sensitivity to distance (Y is purchase  $\times$  100): Full table

| Panel A: sensitivity to own distance: offline demand |                      |                      |                      |                      |
|------------------------------------------------------|----------------------|----------------------|----------------------|----------------------|
|                                                      | offline: branded     | discounter           | gen. merch.          | specialty            |
| log(dist + 1)                                        | -0.161***<br>(0.012) | -0.861***<br>(0.069) | -1.012***<br>(0.208) | -0.145***<br>(0.021) |
| consumer-chain FE                                    | Yes                  | Yes                  | Yes                  | Yes                  |
| chain-year FE                                        | Yes                  | Yes                  | Yes                  | Yes                  |
| choice set FE                                        | Yes                  | Yes                  | Yes                  | Yes                  |
| R-squared                                            | 0.16                 | 0.17                 | 0.19                 | 0.09                 |
| observations                                         | 27139763             | 4076745              | 2446991              | 11939507             |
| Panel B: sensitivity to own distance: online demand  |                      |                      |                      |                      |
|                                                      | online: branded      | discounter           | gen. merch.          | specialty            |
| log(dist + 1)                                        | 0.003<br>(0.003)     | -0.001<br>(0.007)    | -0.005<br>(0.026)    | -0.006<br>(0.005)    |
| consumer-chain FE                                    | Yes                  | Yes                  | Yes                  | Yes                  |
| chain-year FE                                        | Yes                  | Yes                  | Yes                  | Yes                  |
| choice set FE                                        | Yes                  | Yes                  | Yes                  | Yes                  |
| R-squared                                            | 0.13                 | 0.08                 | 0.12                 | 0.07                 |
| observations                                         | 27139763             | 4076745              | 2446991              | 11939507             |

**Notes:** Panel A presents the sensitivity of the consumer's shopping trip to offline chain choice to the distance to the chain's nearest store. The results are presented by retail formats: branded chains, department stores, discounters, general merchandisers, and specialty chains. Panel B presents the sensitivity of online shopping trips to the distance to the closest store. conditions on existing users, i.e. household has purchased from the focal chain before.

## F Implementation detail of the structural model

### F.1 Parameterization of random coefficients

Heterogeneity in chain-channel effects in the quantity-choice stage and the chain-channel choice stage,  $\rho_{ij}$  and  $\delta_{ijc}$ , are specified as a combination of fixed effects and random chain effects:  $\rho_{ij} = \bar{\rho}_j + \sigma_{j,1} v_{ij,1}$  and  $\delta_{ijc} = \bar{\delta}_{jc} + \sigma_{j,2} v_{ij,2}$ ,  $j = 1, \dots, 20$ , where  $v_{ij,1}$  and  $v_{ij,2}$  are IID standard normal draws.

We model the heterogeneity in the utility curvature  $\sigma_i$ , transportation costs  $\beta_i$ , and Poisson arrival rates  $\lambda_i$ , using demographic effects and log normal random effects, as follows

$$\begin{pmatrix} \sigma_i \\ \beta_i \\ \lambda_i \end{pmatrix} = \begin{pmatrix} \sigma \cdot \exp(Z_i \omega_1 + \sigma_1 v_{i1}) \\ \beta \cdot \exp(Z_i \omega_2 + \sigma_2 v_{i2}) \\ \lambda \cdot \exp(Z_i \omega_3 + \sigma_3 v_{i3}) \end{pmatrix}, \quad (\text{F.5})$$

with  $v_{ik}$  being standard normal draws. Demographic variables  $Z_i$  include age bins (cutoff at 40 years old), gender, net monthly income bins (cutoff at 2,500 per month), plus a bin for consumers who do not report net income.

Next, we model the heterogeneous responses to  $X_{ijc}$ , which are time-invariant characteristics that include an intercept, online dummy, brand concentration, and the log average distance:

$$\begin{pmatrix} \gamma_{i1} \\ \gamma_{i2} \\ \gamma_{i3} \\ \gamma_{i4} \\ \theta_{i1} \\ \theta_{i2} \\ \theta_{i3} \\ \theta_{i4} \end{pmatrix} = \begin{pmatrix} Z_i \omega_4 \\ Z_i \omega_5 + \sigma_5 v_{i5} \\ Z_i \omega_6 + \sigma_6 v_{i6} \\ \bar{\gamma}_4 + Z_i \omega_7 \\ Z_i \omega_8 \\ Z_i \omega_9 + \sigma_9 v_{i9} \\ Z_i \omega_{10} + \sigma_{10} v_{i10} \\ \bar{\theta}_4 + Z_i \omega_{11} \end{pmatrix}. \quad (\text{F.6})$$

Most random coefficient terms in  $\gamma_i$  and  $\theta_i$  have mean zero because the baseline is absorbed by chain-channel fixed effects. The only exception is the the log average distance terms,  $\gamma_{i4}$  and  $\theta_{i4}$ , because the baseline is identified from cross-sectional variation in the average distance between

consumer and chains.

## F.2 Derivation of the likelihood function

We demonstrate the derivation of the density function of consumer expenditure,  $E_{ijc\tau}$ .

First, from equation (17), one arrives at

$$\mu_{ijc\tau} := g(E_{ijc\tau}) = \frac{1}{\sigma} \log\left(\frac{\alpha_{li}}{\sigma}\right) + \frac{1-\sigma}{\sigma} \log(E_{ijc\tau}) + \log(P_{jt}) - X_{jc}\theta_i - \rho_j - \eta_{ct}. \quad (\text{F.7})$$

Then, use the  $g(\cdot)$  function from above as a transformation-of-variable between expenditure  $E_{ijc\tau}$  and the marginal utility shock  $\mu_{ijc\tau}$ , and we have

$$\begin{aligned} f_e(E_{ijc\tau}|i) &= \Pr(j, c|\tau, i) \cdot f_e^+(E_{ijc\tau}) \\ &= \Pr(j, c|\tau, i) \cdot f_\mu(g(E_{ijc\tau})) \frac{\partial g(E_{ijc\tau})}{\partial E_{ijc\tau}} \\ &= \Pr(j, c|\tau, i) \cdot f_\mu\left(\frac{1}{\sigma} \log\left(\frac{\alpha_{li}}{\sigma}\right) + \frac{1-\sigma}{\sigma} \log(E_{ijc\tau}) + \log(P_{jt}) - X_{jc}\theta_i - \rho_j - \eta_{ct}\right) \cdot \left(\frac{\partial \frac{1-\sigma}{\sigma} \log(E_{ijc\tau})}{\partial E_{ijc\tau}}\right) \\ &= \Pr(j, c|\tau, i) \cdot \phi\left(\frac{\frac{1}{\sigma} \log\left(\frac{\alpha_{li}}{\sigma}\right) + \frac{1-\sigma}{\sigma} \log(E_{ijc\tau}) + \log(P_{jt}) - X_{jc}\theta_i - \rho_j - \eta_{ct}}{\sigma_\mu}\right) \cdot \left(\frac{1-\sigma}{\sigma} \frac{1}{E_{ijc\tau}}\right) \cdot \frac{1}{\sigma_\mu}, \end{aligned} \quad (\text{F.8})$$

where the last line applies another transformation of variable from  $g(E_{ijc\tau})$  to  $\frac{g(E_{ijc\tau})}{\sigma_\mu} = \mu/\sigma_\mu$ , which is standard normal.

## F.3 Computation of the price equilibrium

In section 4.2, we infer costs and markups by assuming that the first-order condition is correct on average, or  $\frac{1}{T_j} \sum_t \frac{\partial \Pi_{jt}}{\partial P_{jt}} = 0$ , where  $T_j$  is the number of months chain  $j$  stays in the sample. Take derivatives on profit  $\Pi_{jt}$ , defined by equation (23), one arrives at

$$\frac{1}{T_j} \sum_{t=1}^{T_j} \left( \frac{\partial Q_{jt}}{\partial P_{jt}} (P_{jt} \cdot (1 - 0.09) - mc_j) + (1 - 0.09) Q_{jt} \right) = 0, \quad (\text{F.9})$$

where

$$\frac{\partial Q_{jt}}{\partial P_{jt}} = \sum_{c=0,1} \int_i \mathbb{E} \left[ \sum_{\tau=1}^{\bar{\tau}_i} \left( \frac{\partial q_{ijc\tau}}{\partial P_{jt}} \Pr(j, c|\tau, i) + \frac{\partial \Pr(j, c|\tau, i)}{\partial P_{jt}} q_{ijc\tau} \right) | \Theta_i \right] dF(\Theta_i). \quad (\text{F.10})$$

In the above equation, the derivative on quantity conditional on purchase comes from the closed-form quantity demand function (equation (13)). That is,

$$\begin{aligned} \frac{\partial q_{ijc\tau}}{\partial P_{jt}} &= -\frac{1}{1-\sigma_i} \left( \frac{\sigma_i \Psi_{ijc\tau}}{P_{jt}} \right)^{\frac{1}{1-\sigma_i}} P_{jt}^{-1} \\ &= -\frac{1}{1-\sigma_i} \frac{q_{ijc\tau}}{P_{jt}}. \end{aligned} \quad (\text{F.11})$$

On the other hand, the logit choice probability's derivative is:

$$\begin{aligned} \frac{\partial \Pr(j, c|\tau, i)}{\partial P_{jt}} &= \Pr(j, c|\tau, i) (1 - \Pr(j, c|\tau, i)) \frac{\partial \tilde{w}_{ijc\tau}}{\partial P_{jt}} \\ &= \Pr(j, c|\tau, i) (1 - \Pr(j, c|\tau, i)) \left( -\frac{\sigma_i}{1-\sigma_i} \left( \Psi_{ijc\tau} \frac{(q_{ijc\tau})^{\sigma_i}}{P_{jt}} - q_{ijc\tau} \right) \right), \end{aligned} \quad (\text{F.12})$$

where the second line follows the definition of  $\tilde{w}_{ijc\tau}$ , the indirect utility that drives chain-channel choice, in equation (14).

Equations (F.9)–(F.12) give a closed-form solution to the marginal costs of each chain,  $mc_j$ . In counterfactual simulations, we take these costs as given and solve for new equilibrium prices under each scenario, outlined by Table 6.

## G Additional figures and tables

Appendix Table G.1: Sample selection

|                                 | fraction of sample |
|---------------------------------|--------------------|
| chain identity not missing      | 0.644              |
| individual location not missing | 0.999              |
| individual never moved          | 0.831              |
| all of the above                | 0.531              |
| observations                    | 2,267,772          |

**Notes:** This table reports our sample selection criteria.

Appendix Table G.2: Store-entry effect on offline shopping incidence

|              | distance change 5-20km | 1-5km               | 0.1-1km             | 0-0.1km             | no store entry (placebo) |
|--------------|------------------------|---------------------|---------------------|---------------------|--------------------------|
| post entry   | 0.445***<br>(0.038)    | 0.347***<br>(0.035) | 0.199***<br>(0.043) | 0.079<br>(0.050)    | 0.021**<br>(0.006)       |
| pre trend    | -0.004**<br>(0.001)    | -0.003*<br>(0.002)  | -0.005**<br>(0.002) | -0.007**<br>(0.002) | -0.008***<br>(0.000)     |
| post trend   | -0.004**<br>(0.002)    | -0.002<br>(0.001)   | -0.003<br>(0.002)   | -0.006**<br>(0.002) | -0.007***<br>(0.000)     |
| R-squared    | 0.15                   | 0.15                | 0.15                | 0.15                | 0.16                     |
| observations | 1,135,074              | 1,361,960           | 813,099             | 473,821             | 27,299,660               |

**Notes:** This table shows estimates of Equation (4) of the main paper, focusing on consumer-chain pairs where the closest store is within 20 km of the consumer at the start of the sample, and where the chain builds a store and reduces its distance to the customer. We divide the sample into groups where the entry has different impact on the travel distance of the customer. Column 1-4 examines customer-chain pairs where the distance change at entry is 5-20 km, 1-5 km, 0.1-1 km, and 0-0.1 km. Finally, the last column presents a placebo test where we focus on consumer-chain pairs where no store entry or exits are relevant, and we hypothetically assign a “store entry date” for each of such pairs.

Appendix Table G.3: Additional parameter estimates for the structural model

|                        | $\rho_j$ |       | chain choice: offline |       | online  |       | scale of RC |       |
|------------------------|----------|-------|-----------------------|-------|---------|-------|-------------|-------|
| branded chain 1        | 1.306    | 0.026 | -2.950                | 0.051 | -8.197  | 0.119 | 0.645       | 0.021 |
| branded chain 2        | 1.085    | 0.027 | -3.901                | 0.064 | -7.611  | 0.109 | -0.746      | 0.035 |
| branded chain 3        | 1.687    | 0.031 | -4.566                | 0.070 | -8.807  | 0.138 | 0.203       | 0.045 |
| branded chain 4        | 1.927    | 0.034 | -6.050                | 0.108 | -8.870  | 0.139 | 1.241       | 0.059 |
| branded chain 5        | 1.427    | 0.032 | -4.861                | 0.071 | -10.005 | 0.201 | 0.087       | 0.063 |
| branded chain 6        | 1.584    | 0.034 | -4.935                | 0.080 | -9.944  | 0.233 | 0.267       | 0.066 |
| branded chain 7        | 0.616    | 0.027 | -3.648                | 0.073 |         |       | -0.918      | 0.058 |
| other branded chains   | 1.895    | 0.027 | -2.648                | 0.053 | -7.395  | 0.103 | 0.561       | 0.019 |
| department store 1     | 1.284    | 0.026 | -3.087                | 0.056 | -7.895  | 0.126 | -0.664      | 0.027 |
| department store 2     | 2.205    | 0.032 | -6.001                | 0.102 | -10.069 | 0.158 | 1.243       | 0.048 |
| discounters 1          | -0.135   | 0.024 | -3.574                | 0.057 |         |       | 0.825       | 0.029 |
| discounters 2          | 1.602    | 0.034 | -5.286                | 0.070 | -10.584 | 0.233 | 1.070       | 0.071 |
| other discounters      | 0.207    | 0.021 | -2.594                | 0.047 | -9.161  | 0.168 | 0.912       | 0.021 |
| general merch. 1       | 0.310    | 0.026 | -2.967                | 0.064 | -8.213  | 0.127 | 0.669       | 0.025 |
| other general merch.   | 0.071    | 0.024 | -2.929                | 0.047 | -8.486  | 0.163 | -0.934      | 0.021 |
| online chain 1         | 1.760    | 0.034 |                       |       | -7.088  | 0.110 | 0.613       | 0.066 |
| online chain 2         | 2.003    | 0.037 |                       |       | -7.167  | 0.114 | 0.439       | 0.068 |
| other online chains    | 1.565    | 0.029 |                       |       | -5.064  | 0.100 | -0.859      | 0.026 |
| specialty chain 1      | 1.052    | 0.024 | -4.132                | 0.057 | -9.175  | 0.160 | 0.325       | 0.046 |
| other specialty chains | 2.076    | 0.028 | -2.014                | 0.052 | -7.181  | 0.101 | 0.303       | 0.016 |

Appendix Table G.4: Average price elasticity matrix

|                        | (A)   | (B)   | (C)   | (D)   | (E)   | (F)   | (G)   | (H)   | (I)   | (J)   | (K)   | (L)   | (M)   | (N)   | (O)   |
|------------------------|-------|-------|-------|-------|-------|-------|-------|-------|-------|-------|-------|-------|-------|-------|-------|
| (A) branded chain 1    | -2.16 | 0.02  | 0.02  | 0.02  | 0.02  | 0.02  | 0.02  | 0.02  | 0.02  | 0.02  | 0.02  | 0.02  | 0.02  | 0.02  | 0.02  |
| (B) branded chain 2    | 0.01  | -2.12 | 0.01  | 0.01  | 0.01  | 0.01  | 0.01  | 0.01  | 0.01  | 0.01  | 0.01  | 0.01  | 0.01  | 0.01  | 0.01  |
| (C) branded chain 3    | 0.01  | 0.01  | -2.26 | 0.01  | 0.01  | 0.01  | 0.01  | 0.01  | 0.01  | 0.01  | 0.01  | 0.01  | 0.01  | 0.01  | 0.01  |
| (D) branded chain 4    | 0.01  | 0.01  | 0.01  | -2.44 | 0.01  | 0.01  | 0.01  | 0.00  | 0.01  | 0.01  | 0.00  | 0.01  | 0.01  | 0.01  | 0.01  |
| (E) branded chain 5    | 0.00  | 0.00  | 0.00  | 0.00  | -2.16 | 0.00  | 0.00  | 0.00  | 0.00  | 0.00  | 0.00  | 0.00  | 0.00  | 0.00  | 0.00  |
| (F) branded chain 6    | 0.00  | 0.00  | 0.00  | 0.00  | 0.00  | -2.28 | 0.00  | 0.00  | 0.00  | 0.00  | 0.00  | 0.00  | 0.00  | 0.00  | 0.00  |
| (G) branded chain 7    | 0.00  | 0.00  | 0.00  | 0.00  | 0.00  | 0.00  | -2.09 | 0.00  | 0.00  | 0.00  | 0.00  | 0.00  | 0.00  | 0.00  | 0.00  |
| (H) department store 1 | 0.01  | 0.01  | 0.01  | 0.01  | 0.01  | 0.01  | 0.01  | -2.18 | 0.01  | 0.01  | 0.01  | 0.01  | 0.01  | 0.01  | 0.01  |
| (I) department store 2 | 0.01  | 0.01  | 0.01  | 0.01  | 0.01  | 0.01  | 0.01  | 0.01  | -2.75 | 0.00  | 0.01  | 0.00  | 0.01  | 0.01  | 0.01  |
| (J) discounter 1       | 0.00  | 0.00  | 0.00  | 0.00  | 0.00  | 0.00  | 0.00  | 0.00  | 0.00  | -1.93 | 0.00  | 0.00  | 0.00  | 0.00  | 0.00  |
| (K) discounter 2       | 0.00  | 0.00  | 0.00  | 0.00  | 0.00  | 0.00  | 0.00  | 0.00  | 0.00  | 0.00  | -2.25 | 0.00  | 0.00  | 0.00  | 0.00  |
| (L) general merch. 1   | 0.01  | 0.01  | 0.01  | 0.01  | 0.01  | 0.01  | 0.01  | 0.01  | 0.01  | 0.01  | 0.01  | -1.96 | 0.01  | 0.01  | 0.01  |
| (M) online chain 1     | 0.00  | 0.01  | 0.01  | 0.01  | 0.00  | 0.01  | 0.00  | 0.00  | 0.01  | 0.00  | 0.00  | 0.00  | -2.50 | 0.02  | 0.00  |
| (N) online chain 2     | 0.00  | 0.01  | 0.01  | 0.01  | 0.00  | 0.01  | 0.00  | 0.00  | 0.01  | 0.00  | 0.00  | 0.00  | 0.02  | -2.59 | 0.00  |
| (O) specialty chain 1  | 0.00  | 0.00  | 0.00  | 0.00  | 0.00  | 0.01  | 0.01  | 0.00  | 0.01  | 0.00  | 0.00  | 0.00  | 0.00  | 0.00  | -2.20 |

**Notes:** Average (across consumers and time) price elasticity between pairs of chains. Each cell in the table represents the percent-change in purchase incidence to the *column* chain, in response to a percent-change in the price of the *row* chain.

Appendix Table G.5: Structural estimates without random coefficients (and robustness checks)

|                                                                         | main spec. | std err | full sample | std err | w/ 2nd distance | std err | less flex ctrl | std err |
|-------------------------------------------------------------------------|------------|---------|-------------|---------|-----------------|---------|----------------|---------|
| utility curvature ( $\sigma$ )                                          | 0.066      | 0.003   | 0.058       | 0.001   | 0.067           | 0.003   | 0.072          | 0.003   |
| $\theta \times \text{age} > 45$                                         | -0.017     | 0.005   | -0.008      | 0.001   | -0.017          | 0.004   |                |         |
| $\theta \times \text{female}$                                           | -0.039     | 0.005   | -0.031      | 0.001   | -0.017          | 0.005   |                |         |
| $\theta \times \text{high income}$                                      | 0.086      | 0.005   | 0.068       | 0.001   | -0.040          | 0.005   |                |         |
| $\theta \times \text{inc missing}$                                      | 0.049      | 0.005   | 0.050       | 0.001   | 0.086           | 0.005   |                |         |
| $\theta \times \text{online} \times \text{age} > 45$                    | -0.005     | 0.010   | -0.015      | 0.003   | -0.005          | 0.010   | 0.019          | 0.009   |
| $\theta \times \text{online} \times \text{female}$                      | -0.026     | 0.009   | 0.002       | 0.002   | -0.026          | 0.009   | -0.056         | 0.008   |
| $\theta \times \text{online} \times \text{high income}$                 | 0.016      | 0.009   | 0.008       | 0.003   | 0.016           | 0.009   | 0.066          | 0.009   |
| $\theta \times \text{online} \times \text{inc missing}$                 | 0.071      | 0.011   | 0.019       | 0.003   | 0.072           | 0.011   | 0.081          | 0.010   |
| $\theta \times \text{brand HHI} \times \text{age} > 45$                 | -0.055     | 0.009   | -0.011      | 0.002   | -0.055          | 0.009   | -0.044         | 0.008   |
| $\theta \times \text{brand HHI} \times \text{female}$                   | 0.059      | 0.009   | 0.053       | 0.003   | 0.060           | 0.009   | -0.013         | 0.008   |
| $\theta \times \text{brand HHI} \times \text{high income}$              | -0.042     | 0.008   | -0.007      | 0.002   | -0.042          | 0.008   | 0.044          | 0.008   |
| $\theta \times \text{brand HHI} \times \text{inc missing}$              | -0.052     | 0.009   | -0.004      | 0.003   | -0.053          | 0.010   | -0.006         | 0.008   |
| $\theta \times \log(\text{avg distance} + 1)$                           | -0.017     | 0.004   | -0.013      | 0.001   | 0.252           | 0.033   |                |         |
| $\theta \times \log(\text{avg distance} + 1) \times \text{age} > 45$    | 0.027      | 0.003   | 0.020       | 0.001   | 0.049           | 0.005   |                |         |
| $\theta \times \log(\text{avg distance} + 1) \times \text{female}$      | -0.002     | 0.002   | -0.005      | 0.001   | 0.027           | 0.003   |                |         |
| $\theta \times \log(\text{avg distance} + 1) \times \text{high income}$ | -0.005     | 0.003   | -0.003      | 0.001   | -0.002          | 0.002   |                |         |
| $\theta \times \log(\text{avg distance} + 1) \times \text{inc missing}$ | -0.009     | 0.003   | -0.002      | 0.001   | -0.005          | 0.003   |                |         |
| scale of $\mu$                                                          | 0.836      | 0.003   | 0.841       | 0.001   | 0.835           | 0.003   | 0.839          | 0.003   |
| arrival rate of choice occasions ( $\lambda$ )                          | 1.029      | 0.025   | 0.980       | 0.008   | 1.029           | 0.025   | 0.947          | 0.023   |
| $\log(\text{distance} + 1)$ ( $\beta$ )                                 | -0.335     | 0.021   | -0.246      | 0.007   | -0.346          | 0.021   | -0.411         | 0.014   |
| $\log(\text{second distance} + 1)$                                      |            |         |             |         | 0.047           | 0.008   |                |         |
| age > 45                                                                | 0.527      | 0.039   | 0.546       | 0.012   | 0.279           | 0.035   |                |         |
| female                                                                  | 0.906      | 0.034   | 0.850       | 0.011   | 0.525           | 0.039   |                |         |
| high income                                                             | -0.292     | 0.034   | -0.327      | 0.011   | 0.906           | 0.034   |                |         |
| inc missing                                                             | -0.251     | 0.040   | -0.303      | 0.013   | -0.291          | 0.034   |                |         |
| $\beta \times \text{age} > 45$                                          | 0.129      | 0.020   | 0.004       | 0.007   | 0.137           | 0.020   | 0.044          | 0.010   |
| $\beta \times \text{female}$                                            | 0.115      | 0.020   | -0.001      | 0.006   | 0.121           | 0.020   | 0.106          | 0.009   |
| $\beta \times \text{high income}$                                       | -0.015     | 0.021   | 0.010       | 0.007   | -0.010          | 0.021   | 0.016          | 0.010   |
| $\beta \times \text{inc missing}$                                       | -0.237     | 0.026   | -0.026      | 0.008   | -0.233          | 0.026   | -0.033         | 0.011   |
| online $\times$ age > 45                                                | -0.489     | 0.096   | -0.302      | 0.029   | -0.492          | 0.096   | -0.759         | 0.087   |
| online $\times$ female                                                  | 0.478      | 0.088   | 0.087       | 0.028   | 0.473           | 0.087   | 0.425          | 0.085   |
| online $\times$ high income                                             | -0.029     | 0.090   | -0.079      | 0.029   | -0.032          | 0.090   | -0.564         | 0.089   |
| online $\times$ inc missing                                             | -0.491     | 0.102   | -0.047      | 0.031   | -0.495          | 0.102   | -0.575         | 0.095   |
| brand HHI $\times$ age > 45                                             | 0.032      | 0.049   | -0.183      | 0.016   | 0.030           | 0.049   | -0.015         | 0.040   |
| brand HHI $\times$ female                                               | 0.219      | 0.047   | 0.209       | 0.016   | 0.218           | 0.047   | 0.859          | 0.040   |
| brand HHI $\times$ high income                                          | 0.446      | 0.045   | 0.270       | 0.015   | 0.446           | 0.045   | -0.121         | 0.037   |
| brand HHI $\times$ inc missing                                          | 0.320      | 0.052   | 0.205       | 0.017   | 0.322           | 0.052   | 0.076          | 0.043   |
| $\log(\text{avg distance} + 1)$                                         | 0.291      | 0.035   | 0.132       | 0.011   | -0.002          | 0.000   |                |         |
| $\log(\text{avg distance} + 1) \times \text{age} > 45$                  | -0.399     | 0.030   | -0.250      | 0.010   | -0.251          | 0.040   |                |         |
| $\log(\text{avg distance} + 1) \times \text{female}$                    | -0.196     | 0.026   | -0.016      | 0.009   | -0.403          | 0.030   |                |         |
| $\log(\text{avg distance} + 1) \times \text{high income}$               | -0.032     | 0.027   | 0.022       | 0.009   | -0.200          | 0.026   |                |         |
| $\log(\text{avg distance} + 1) \times \text{inc missing}$               | 0.256      | 0.033   | 0.045       | 0.010   | -0.036          | 0.027   |                |         |

**Notes:** The first column presents structural estimates without individual random coefficients, using the same estimation sample as the main model. The second column uses the full sample. The third column uses the estimation sample but also allows consumer store choices to depend on her distance to the second-closest store (“second distance”). The fourth column presents the estimates of a restrictive specification where we take away controls that resemble cross-sectional variation between consumers (i.e., baseline demographics, log average distance, and the interaction between the two sets of variables).

Appendix Table G.6: Gains from e-commerce and decomposition (year 2018)

|                                          | mean surplus (euros) | (std err) | 25%    | (std err) | 75%    | (std err) |
|------------------------------------------|----------------------|-----------|--------|-----------|--------|-----------|
| equiv. variations: remove all online     | 469.39               | 7.22      | 294.82 | 5.37      | 596.79 | 9.48      |
| ... from transport. costs                | 208.86               | 4.15      | 90.00  | 0.00      | 270.00 | 4.74      |
| ... from online-only rtl.                | 142.72               | 4.16      | 68.51  | 4.11      | 186.00 | 9.09      |
| ... from online channel of existing rtl. | 111.38               | 3.33      | 60.00  | 2.43      | 150.00 | 2.69      |
| ... from price changes                   | 6.44                 | 0.50      | 2.50   | 0.00      | 10.00  | 0.81      |

**Notes:** These tables present the decomposition of welfare gains from e-commerce, focusing on year 2018. Mean consumer surplus is the average equivalent variation,  $\bar{\Delta}_{iy}$ , for each individual  $i$  and for  $y = 2018$ .

Appendix Table G.7: Changes in equilibrium prices from taking away e-commerce (year 2018)

|                                          | mean | (std err) | std  | (std err) |
|------------------------------------------|------|-----------|------|-----------|
| price change: all online                 | 0.01 | 0.00      | 0.01 | 0.00      |
| ... from transport. costs                | 0.00 | 0.00      | 0.00 | 0.00      |
| ... from online-only rtl.                | 0.00 | 0.00      | 0.00 | 0.00      |
| ... from online channel of existing rtl. | 0.01 | 0.00      | 0.01 | 0.00      |

**Notes:** Counterfactual changes in equilibrium prices when e-commerce is taken away, focusing on year 2018.

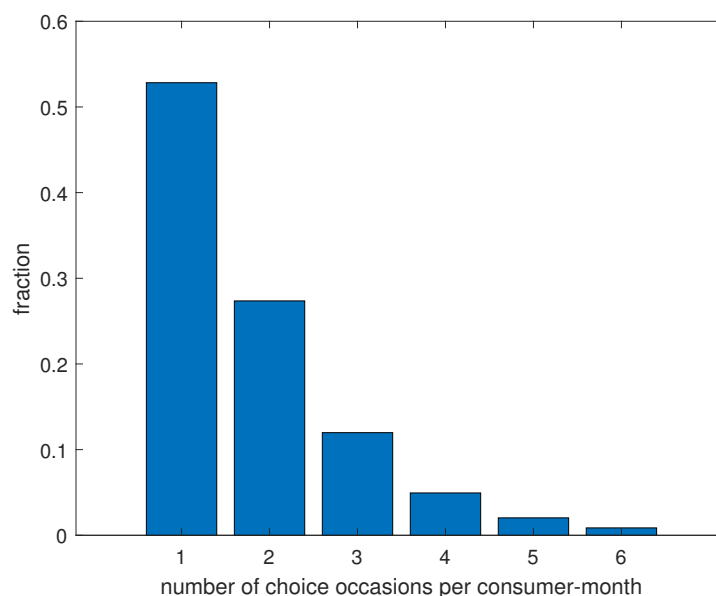

Appendix Figure G.1: Distribution of choice occasions

**Notes:** Distribution of choice occasions across consumers.

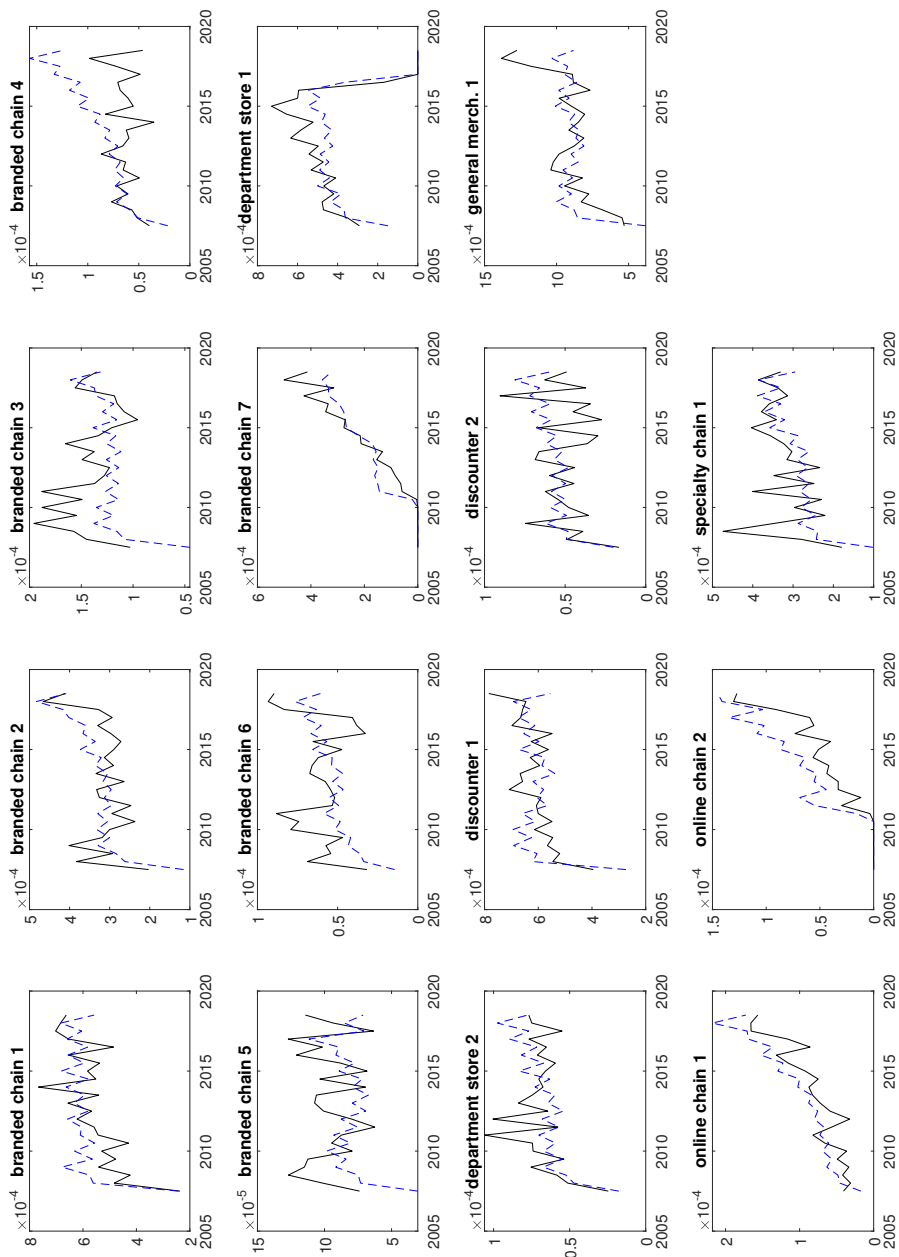

Appendix Figure G.2: Observed and model-predicted quantity

**Notes:** This figure reports observed (in solid) and simulated (in dash) expected per-customer purchase quantity for each chain over time.
